# Supplementary material for: Serum albumin: a pharmacokinetic marker for optimizing treatment outcome of immune checkpoint blockade
Source: PubMed Central journal article supplement — J Immunother Cancer. 2022 Dec 20;10(12):e005670. doi: 10.1136/jitc-2022-005670 (PMC9772729; doi:10.1136/jitc-2022-005670), 2022-12-20

# Serum albumin: a pharmacokinetic marker for optimizing treatment outcome of immune checkpoint blockade

## Graphical Abstract

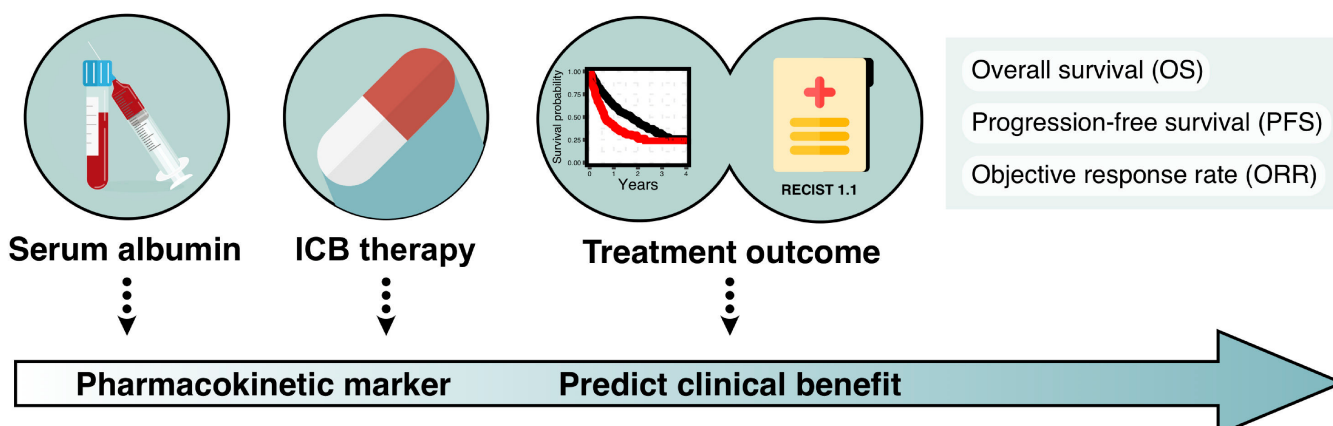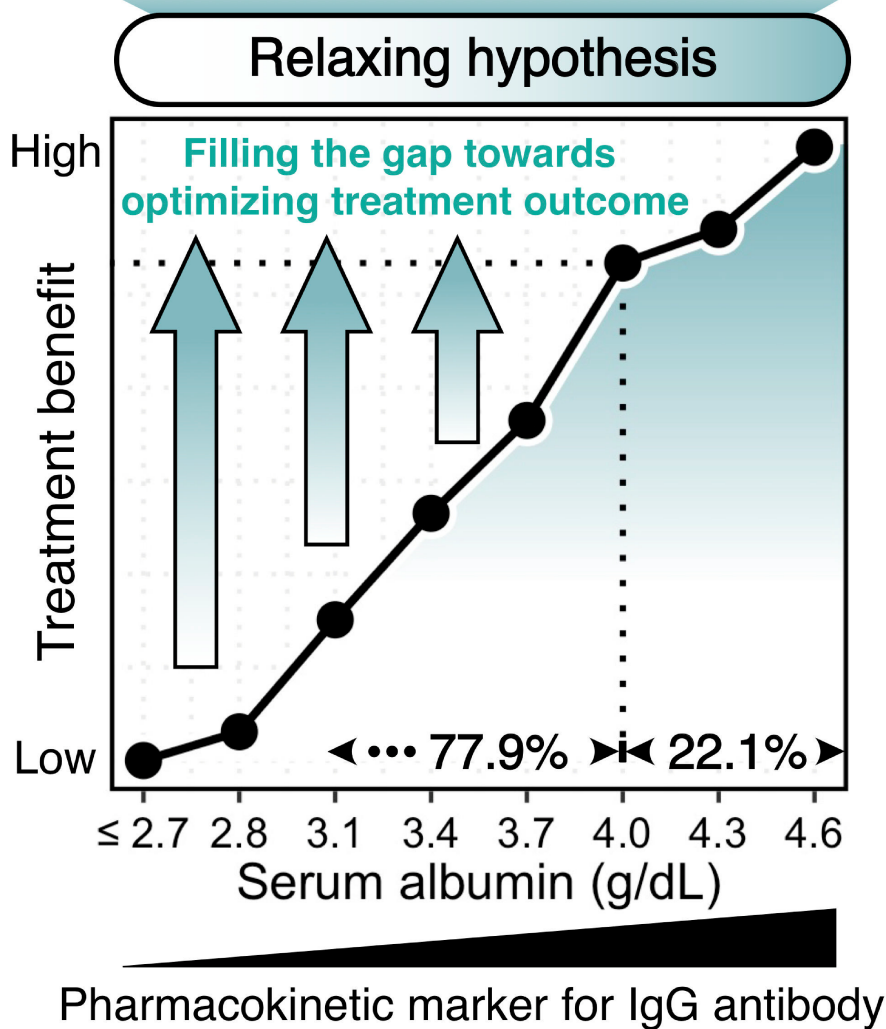

Supplement: jitc-2022-005670supp002.pdf [file jitc-2022-005670supp002.pdf]
